# Supplementary material for: Gender-stratified analyses of symptoms associated with acute coronary syndrome in telephone triage: a cross-sectional study
Source: PubMed Central journal article supplement — BMJ Open. 2021 Jun 25;11(6):e042406. doi: 10.1136/bmjopen-2020-042406 (PMC8237735; doi:10.1136/bmjopen-2020-042406), 2021-06-25
Supplement: bmjopen-2020-042406supp001.pdf [file bmjopen-2020-042406supp001.pdf]

## Supplementary file

Appendix-Table 1: Overview of ICD-10-codes used to select calls

| ICD-10 code                                           | Calls of patients with ACS<br>N=205 (%) | Calls of patients without ACS<br>N=1,590 (%) |
|-------------------------------------------------------|-----------------------------------------|----------------------------------------------|
| <b>K01 Pain attributed to the heart</b>               | 112 (54.6)                              | 485 (30.5)                                   |
| <b>K02 Pressure/tightness attributed to the heart</b> | 39 (19.0)                               | 184 (11.6)                                   |
| <b>K03 Other cardiovascular pain</b>                  | 1 (0.5)                                 | 6 (0.4)                                      |
| <b>K24 Fear of heart attack</b>                       | 1 (0.5)                                 | 8 (0.5)                                      |
| <b>K74 Angina pectoris</b>                            | 19 (9.3)                                | 101 (6.4)                                    |
| <b>K75 Acute myocardial infarction</b>                | 7 (3.4)                                 | 22 (1.4)                                     |
| <b>K76 Other/chronic ischaemic heart disease</b>      | 0 (0.0)                                 | 2 (0.1)                                      |
| <b>K77 Heart failure</b>                              | 0 (0.0)                                 | 11 (0.7)                                     |
| <b>K93 Pulmonary embolism</b>                         | 0 (0.0)                                 | 15 (0.9)                                     |
| <b>L04 Chest discomfort</b>                           | 25 (12.2)                               | 689 (43.9)                                   |
| <b>P74 Anxiety disorder</b>                           | 0 (0.0)                                 | 12 (0.8)                                     |
| <b>R02 Shortness of breath</b>                        | 1 (0.5)                                 | 36 (2.3)                                     |
| <b>R98 Hyperventilation</b>                           | 0 (0.0)                                 | 10 (0.6)                                     |

**Appendix-Table 2: Urgency levels**

| Urgency level | Implication                                                     |
|---------------|-----------------------------------------------------------------|
| U0            | Reanimation                                                     |
| U1            | Life-threatening, GP/ ambulance should arrive within 15 minutes |
| U2            | Emergency, GP should arrive within 60 minutes                   |
| U3            | Urgent, consultation by GP within three hours                   |
| U4            | Routine, consultation by GP the same day                        |
| U5            | Advice given by triage nurse                                    |

**Appendix-Table 3: Relation of caller to patient in women and men with ACS**

|                                                                  | <b>Women</b><br>n= 85 (8.6%) | <b>Men</b><br>n = 120 (15.0%) | <b>P-value</b> |
|------------------------------------------------------------------|------------------------------|-------------------------------|----------------|
| Someone else calls on behalf of patient                          | 59 (69.4)                    | 79 (65.8)                     | 0.590          |
| Partner                                                          | 16 (18.8)                    | 64 (53.3)                     | <0.001         |
| Son, daughter or other family member                             | 20 (23.5)                    | 8 (6.7)                       | 0.001          |
| Nurse                                                            | 15 (17.6)                    | 4 (3.3)                       | <0.001         |
| Other (neighbour, friend, colleague)                             | 8 (9.4)                      | 3 (2.5)                       | 0.030          |
| Patient takes over the phone call on request of the triage nurse | 27 (45.8)                    | 58 (73.4)                     | <0.001         |
